# Supplementary material for: Regulatory T cells may participate in Helicobacter pylori persistence in gastric MALT lymphoma: lessons from an animal model
Source: PubMed Central journal article supplement (PMC4823114; doi:10.18632/oncotarget.6492), 2015-12-07
Supplement: oncotarget-07-3394-s001.pdf [file oncotarget-07-3394-s001.pdf]

## SUPPLEMENTARY FIGURE

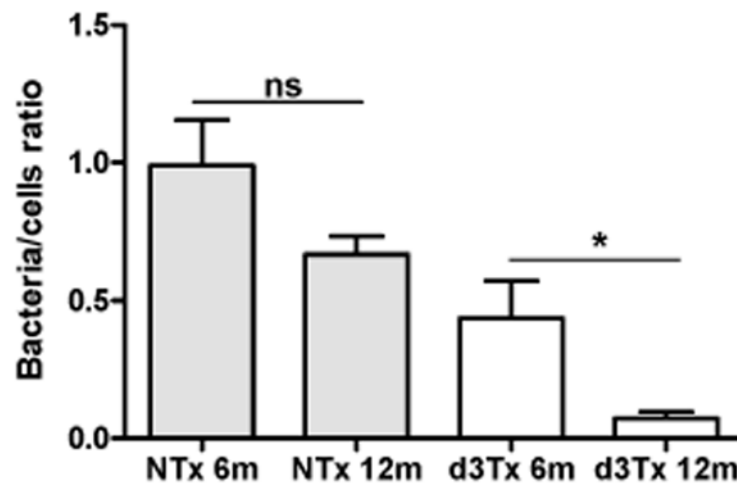

**Supplementary Figure S1: Comparison of the bacterial load in gastric biopsies of NTx and d3Tx infected mice at 6 and 12 months post-infection.** Results obtained by quantitative PCR. Grey bars represent the bacteria/murine cell ratio in NTx mice at 6 and 12 months post-infection ( $n = 38$  and  $n = 40$ , respectively), white bars for data obtained in d3Tx ( $n = 36$  and  $n = 32$ , respectively). Data are plotted as bar graphs displaying the mean  $\pm$  standard deviation for each group,  $*p < 0.05$ .
